# Supplementary material
Source: PubMed Central journal article supplement (PMC2391172)
Supplement: rsbl20070192s15.pdf [file rsbl20070192s15.pdf]

**Table S1.** Origin of *Drosophila* strains used in this study. The study species represent nine of 12

subgroups of the *D. melanogaster* species group. The three unsampled subgroups (the *D. longissima*,

*D. flavohirta*, and *D. denticulata* subgroups) are species-poor taxa without easily available stocks.

| Species<br>(Subgroup)                                     | Origin (Strain name)<br>[Donor]                                      |
|-----------------------------------------------------------|----------------------------------------------------------------------|
| <i>D. bipectinata</i><br>( <i>ananassae</i> )             | Iriomote-Jima, Japan<br>[M. T. Kimura]                               |
| <i>D. parabipectinata</i><br>( <i>ananassae</i> )         | Sabah, Malaysia<br>[K. Akutsu]                                       |
| <i>D. malerkotliana pallens</i><br>( <i>ananassae</i> )   | Bogor, Indonesia<br>[M. T. Kimura]                                   |
| <i>D. pseudoananassae nigrens</i><br>( <i>ananassae</i> ) | Sabah, Malaysia<br>[K. Akutsu]                                       |
| <i>D. p. pseudoananassae</i><br>( <i>ananassae</i> )      | Palawan, Philippines (R186)<br>[Tokyo Metropolitan Univ.]            |
| <i>D. ananassae</i><br>( <i>ananassae</i> )               | San Luis Potosi, Mexico (14024-0371.0)<br>[Tokyo Metropolitan Univ.] |
| <i>D. ananassae</i><br>( <i>ananassae</i> )               | Kume-Jima, Japan (k-aaa029)<br>[M. Matsuda]                          |
| <i>D. pallidosa</i><br>( <i>ananassae</i> )               | Pago Pago Island, Samoa (14024-0433.01)<br>[Tucson Stock Center]     |
| <i>D. atripex</i><br>( <i>ananassae</i> )                 | Sabah, Malaysia (14024-0361.02)<br>[Tucson Stock Center]             |
| <i>D. varians</i><br>( <i>ananassae</i> )                 | Philippines<br>[Tokyo Metropolitan Univ.]                            |
| <i>D. merina</i><br>( <i>ananassae</i> )                  | Antananarivo, Madagascar (k-aah002)<br>[M. Matsuda]                  |
| <i>D. kikkawai</i><br>( <i>montium</i> )                  | Naha, Japan (Naha-4)<br>[Tokyo Metropolitan Univ.]                   |
| <i>D. triauraria</i><br>( <i>montium</i> )                | Amami-Oshima, Japan<br>[M. T. Kimura and M. Kondoh]                  |
| <i>D. melanogaster</i><br>( <i>melanogaster</i> )         | Sapporo, Japan<br>[Collected by the author]                          |
| <i>D. simulans</i><br>( <i>melanogaster</i> )             | Sapporo, Japan<br>[Collected by the author]                          |
| <i>D. eugracilis</i><br>( <i>eugracilis</i> )             | Malaysia (MDh 158)<br>[Tokyo Metropolitan Univ.]                     |
| <i>D. fuyamai</i><br>( <i>rhopaloa</i> )                  | Chiang Mai, Thailand<br>[Tokyo Metropolitan Univ.]                   |
| <i>D. mimetica</i><br>( <i>suzukii</i> -1)                | Chiang Mai, Thailand (CNX 329)<br>[Tokyo Metropolitan Univ.]         |
| <i>D. lutescens</i><br>( <i>takahashii</i> )              | Okayama, Japan<br>[Collected by the author]                          |
| <i>D. suzukii</i><br>( <i>suzukii</i> -2)                 | Sapporo, Japan<br>[Collected by the author]                          |
| <i>D. lucipennis</i><br>( <i>suzukii</i> -3)              | Chitou, Taiwan (14023-0331.00)<br>[Tucson Stock Center]              |
| <i>D. elegans</i><br>( <i>elegans</i> )                   | Iriomote-Jima, Japan (IMO 1980)<br>[Tokyo Metropolitan Univ.]        |
| <i>D. ficusphila</i><br>( <i>ficusphila</i> )             | Iriomote-Jima, Japan<br>[M. T. Kimura]                               |
